# Supplementary material
Source: Springer Nature journal article supplement (https://www.springermedizin.de/resource/supplementary/13014_2012_750_MOESM6_ESM.pdf/9634002)

**A** miR-21 expression levels in cell lines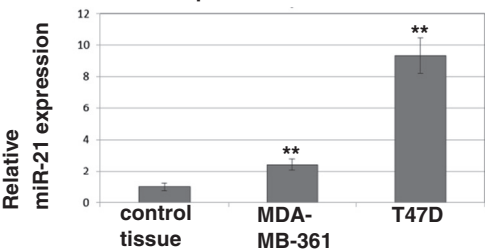**B** miR-21 expression in T47D cells after 5 Gy irradiation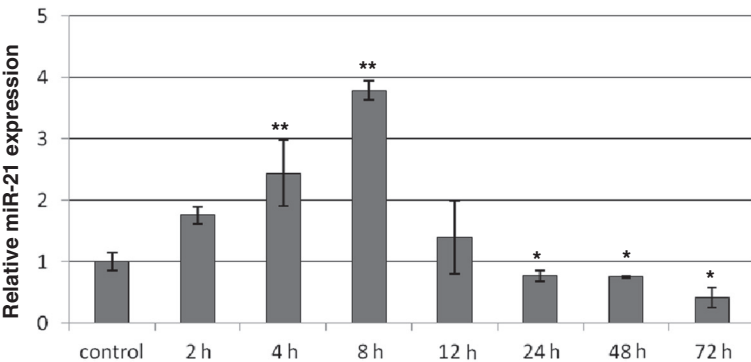**C** miR-21 expression in MDA-MB-361 cells after 5 Gy irradiation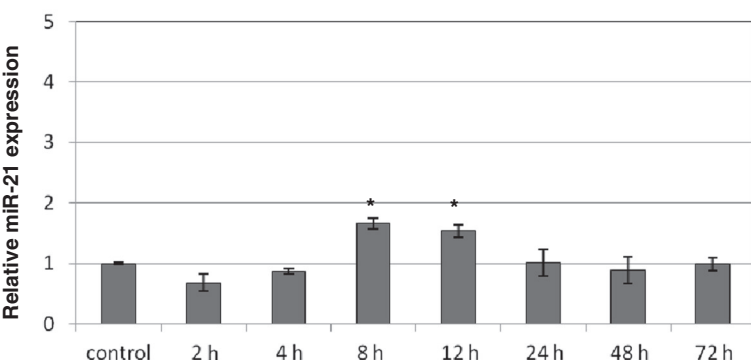

Supplement: MOESM6 [file 9634002]
